# Supplementary material for: Prdm14 promotes germline fate and naive pluripotency by repressing FGF signalling and DNA methylation
Source: PubMed Central journal article supplement (PMC3701237; doi:10.1038/embor.2013.67), 2013-05-14
Supplement: embor201367s4.pdf [file embor201367s4.pdf]

Manuscript EMBOR-2012-36894

**Prdm14 promotes germline fate and naïve pluripotency by repressing FGF signaling and DNA methylation**

Nils Grabole, Julia Tischler, Jamie A. Hackett, Shinseog Kim, Fuchou Tang, Harry G. Leitch, Erna Magnúsdóttir and M. Azim Surani

*Corresponding author: M. Azim Surani, University of Cambridge*

---

**Review timeline:**

Submission date:

22 November 2012

Accepted:

18 April 2013

---

**Transaction Report:**

No Peer Review Process File is available with this article, as the authors have chosen not to make the review process public in this case.
